# Supplementary material for: Evolutionary expansion of DNA hypomethylation in the mammalian germline genome
Source: HighWire-hosted journal article supplement (doi:10.1101/gr.225896.117), 2017-12-19
Supplement: Supplemental_Tables.xlsx [file Supplemental_Tables.xlsx]

## Sheet: Table S1
Table S1: Sequencing and mapping statistics.
											Methylated Cytosines in non-CpG context
Samples profiled in this study	Library	Read pairs	Mapping rate (pairs, with duplicates)	% distinct	BS conversion	Mean depth at covered CpGs	Fraction CpG covered	Fractional methylation level	Mean methylation level	Weighted methylation level	CHH	CXG	CCG
Gorilla R1	1	562300394	0.674	0.495	0.993	11.8	0.886	0.7688	0.706	0.717756	0.00135054	0.00135014	0.00188628
	2	223722667	0.683	0.581	0.993
Rat R1	1	293911597	0.725	0.97	0.996	8.7	0.866	0.833507	0.771	0.76521	0.000893474	0.000800431	0.000980797
Rat R2	1	229260434	0.749	0.975	0.996	8.1	0.811	0.839217	0.757	0.786936	0.000977256	0.000891756	0.00107585
Dog R1.1	1	127103271	0.789	0.953	0.995	24	0.97	0.818178	0.754262	0.725833	0.000712455	0.000673978	0.000979774
	2	249163094	0.805	0.919	0.995
Dog R1.2	1	191290359	0.91	0.896	0.996	15	0.955	0.816359	0.762694	0.769238	0.00052814	0.000632164	0.00124961
	2	109118178	0.912	0.918	0.996
Dog R2	1	157442199	0.908	0.934	0.996	19.1	0.954047	0.809451	0.743706	0.745771	0.000552493	0.000598596	0.000980144
	2	142144673	0.905	0.941	0.996
Dog R3	1	131594739	0.919	0.927	0.995	28.5	0.971	0.814409	0.739106	0.707037	0.000616473	0.000617402	0.000901235
	2	262357934	0.842	0.9	0.995

## Sheet: Table S2
Table S2: Methylation levels and HMR sizes in mammalian sperm and somatic methylomes.
										Promoter (overlapping Ensembl TSS)							Non-promoter
Type	Species	Assembly	Tissue	Sample/Replicate	Mean methylation level	Mean depth at covered CpGs	#HMR	Mean HMR size (bp)	Median size (bp)	#HMR	Mean Size (bp)	Meadian_Size (bp)	lower quartile (bp)	higher quartile (bp)	Standard Deviation (Top 1% HMR sizes removed as outliers)	Standard Deviation of log10(HMR sizes)	#HMR	Mean Size (bp)	Meadian Size (bp)	lower quartile (bp)	higher quartile (bp)	Standard Deviation (Top 1% HMR sizes removed as outliers)	Standard Deviation of log10(HMR sizes)	Public data accession
Sperm	Human	hg19	Sperm	pooled	0.733515	70.7466	93384	1705.17	1205	20749	3163.22	2824	1962	3828	1571.92	0.261148	72635	1288.67	962	523	1578	977.509	0.399427	GSE30340,GSE49624
				R1	0.732321	10.2232	84516	2018.39	1411	20663	3308.46	2855	1979	3916.5	1710.77	0.262958	63853	1600.91	1127	676	1831	1270.48	0.37311	GSM752295
				R2	0.693919	7.72639	66833	1971.9	1416	19866	3087.1	2721.5	1912.25	3708.75	1548.5	0.25226	46967	1500.2	1079	660	1717	1136.29	0.349109	GSM752296
				R3	0.754485	27.7616	79349	1867.4	1340	20342	3249.2	2886	2023	3896	1613.17	0.255654	59007	1391.04	1039	587	1693	1041.37	0.382558	GSM1375216-23
				R4	0.75072	27.757	82558	1837.5	1322	20387	3132.64	2784	1964	3749	1554.28	0.254088	62171	1412.8	1037	591	1706	1076.77	0.381236	GSM1375224-32
	Chimp	panTro4	Sperm	pooled	0.68271	20.5218	71271	1706.23	1189	11466	3566.53	3272	2347.25	4379	1597.95	0.231001	59805	1349.56	1005	558	1660	997.087	0.393018	GSE30340
				R1	0.687428	10.5926	64446	1764.82	1254	11399	3507.33	3212	2303	4323.5	1578.19	0.230048	53047	1390.39	1049	602	1706	1004	0.372681	GSM752297
				R2	0.678559	10.4135	65450	1789.18	1275	11439	3493.09	3201	2308.5	4284	1563.21	0.23114	54011	1428.31	1076	637	1748	1010.55	0.362424	GSM752298
	Gorilla	gorGor3	Sperm		0.686865	11.7926	73650	1693.73	1245	11346	3281.64	2943	2140.25	3954	1530.06	0.239187	62304	1404.56	1066	595	1771	1040.23	0.383788	This study
	Rhesus	rheMac3	Sperm		0.780383	22.0009	72189	1269.27	915	8417	2698.23	2467	1818	3199	1228.81	0.236091	63772	1080.67	790	336	1455	891.481	0.463104	GSE60166(GSM1466810)
	Mouse	mm10	Sperm	pooled	0.786142	32.0116	74681	1617.16	1264	17838	2334.27	2086	1527	2780.75	1116.24	0.233703	56843	1392.12	1066	684	1630	976.25	0.320734	GSE49624
				R1	0.793692	8.26618	66674	1484.06	1202	17421	2227.57	2003	1465	2677	1055.34	0.234475	49253	1221.08	997	634	1493	775.726	0.312517	GSM1202750
				R2	0.793775	8.53403	66674	1484.06	1202	17421	2227.57	2003	1465	2677	1055.34	0.234475	49253	1221.08	997	634	1493	775.726	0.312517	GSM1202751
				R3	0.793507	8.62107	66922	1489.94	1211	17412	2234.49	2003	1467	2679	1060.31	0.234916	49510	1228.1	1000	639	1504	781.242	0.311659	GSM1202752
				R4	0.793734	8.53533	66696	1493.71	1210	17371	2236.51	2010	1473.5	2674	1054.5	0.234559	49325	1232.11	998	639	1510	786.963	0.312987	GSM1202753
	Rat	rn5	Sperm	pooled	0.745857	16.5088	77699	1416.57	1178	12125	2249.15	2005	1516	2655	1034.52	0.22058	65574	1262.62	1053	658	1586	796.319	0.364971	This study
				R1	0.757372	8.7491	69949	1441.66	1198	11908	2234.93	1989	1505	2630.25	1029.15	0.219587	58041	1278.91	1069	686	1593	786.693	0.339358
				R2	0.770517	8.14808	71085	1389.17	1163	11860	2211.3	1961	1483	2595.25	1026.65	0.219132	59225	1224.54	1032	652	1541	751.227	0.352629
	Dog	canFam3	Sperm	pooled	0.740837	90.1796	67310	1303.04	880	9772	2836.57	2575	2000	3223	1088.14	0.227261	57538	1042.59	725	348	1395	830.339	0.456129
				R1	0.745573	41.3965	63746	1301.31	900	9688	2745.8	2527	1958	3177	1062.68	0.225126	54058	1042.44	733	347	1398	829.765	0.462089
				R2	0.739326	19.647	64807	1227.91	830	9654	2675	2506	1937.25	3132	1035.43	0.225139	55153	974.608	667	304	1324	812.875	0.479393
				R3	0.743635	29.8696	59039	1211.67	859	9507	2564.63	2408	1864.5	3033	990.959	0.218531	49532	951.985	665	272	1331	810.59	0.509016
Somatic and ESC	Human	hg19	B cell		0.737004	11.8056	52685	1054.31	701	17711	1812.14	1526	1042	2183.5	1059.8	0.304551	34974	670.536	489	297	806	491.292	0.338835	GSE31971
	Chimp	panTro4	B cell		0.742381	7.35464	48813	1017.46	678	10657	1942.56	1645	1191	2288	1034.02	0.261851	38156	759.086	528	314	915	586.001	0.35163	GSE31971
	Gorilla	gorGor3	Whole blood		0.681387	21.2606	56442	1024.38	703	10490	2065.63	1659.5	1192	2319	1220.29	0.273717	45952	786.687	578	341	986	573.06	0.35092	SRP059313
	Rhesus	rheMac3	PBMC	pooled	0.741072	65.1474	62529	910.701	592	7648	1988.95	1583	1131.75	2206	1227.37	0.286796	54881	760.441	522	306	931	585.222	0.362054	GSE34128
				high-rank	0.738514	31.1679	58942	927.908	605	7572	1981.91	1574	1123	2201.25	1213.74	0.288822	51370	772.547	528	308	952	596.5	0.366178	GSM842196,GSM842199,GSM842201
				low-rank	0.745812	34.5766	62044	906.686	584	7634	1980.72	1580	1124.25	2194	1209.14	0.289598	54410	755.994	515	302	923	586.609	0.365961	GSM842197,GSM842198,GSM842200
	Mouse	mm10	B cell	pooled	0.797142	42.2138	59079	937.988	596	15373	1914.89	1559	1102	2204	1103.93	0.284427	43706	594.375	448	273	730	417.15	0.339503	SRP029721
				activated	0.79225	24.374	57493	932.386	590	15285	1887.66	1543	1087	2179	1095.28	0.283702	42208	586.448	439	267	718	415.809	0.338412	SRR1020509,SRR1020522,SRR1020523
				resting	0.798773	19.999	54460	929.223	597	15144	1838.88	1507	1059	2115.25	1052.46	0.280556	39316	578.836	433	262	712	411.101	0.357843	SRR1003257
	Rat	rn5	Left ventricle	pooled	0.826797	63.4977	55575	924.261	688	10918	1628.02	1398	1006	1970.75	851.996	0.252259	44657	752.202	581	373	933	505.167	0.326486	ERP002215(ERX202410-25)
	Human	hg19	ESC	H9	0.812121	11.2292	39714	1118.67	756	15933	1858.22	1510	1065	2130	1117.97	0.31267	23781	623.183	416	250	759	498.528	0.380126	SRX026814
			ESC	H1	0.791674	27.3712	36349	1156.02	817	16091	1831.1	1469	1046.5	2075	1124.42	0.299818	20258	619.8	393	233	747	527.772	0.402217	GSE16256(GSM429321-23,GSM432685-86)
	Mouse	mm10	ESC		0.793	12.0495	40480	1292.14	995	14862	1934.96	1675	1153	2348.75	1065.23	0.271367	25618	919.216	674	383	1174	702.263	0.39804	GSE30206(GSM748786)

## Sheet: Table S3
Table S3: Retrotransposon hypomethylation in sperm
		%repeat < 0.4 methylation
Species	Cell type	SINE	LINE	LTR	Other*	Satellite
Human	Sperm	0.0667351	0.055962	0.065095	0.365996	0.611298
Chimp	Sperm	0.0586066	0.0453427	0.0313916	0.0549693	0.550565
Gorilla	Sperm	0.0825081	0.0631924	0.0695643	0.0688406	0.601808
Rhesus	Sperm	0.0662468	0.0532856	0.0556475	0.262774	0.437956
Mouse	Sperm	0.0414055	0.0376876	0.0459174	0.0560796	0.0702875
Rat	Sperm	0.0678472	0.0638889	0.0685277	0.0695128	0.260792
Dog	Sperm	0.0586066	0.0453427	0.0313916	NA	0.402093
Human	B cell	0.0325348	0.0508114	0.0603853	0.0170233	0.13378
Human	ESC (H1)	0.0101061	0.0135754	0.0161599	0.00954479	0.0412975
Human	ESC (H9)	0.0122601	0.0185986	0.0216364	0.0123213	0.0761953
Chimp	B cell	0.0348326	0.0549191	0.0603717	0.0243291	0.14712
Gorilla	Whole blood	0.0479399	0.0647262	0.0720392	0.03474	0.11215
Rhesus	PBMC	0.0268527	0.0482461	0.0463026	0.0647482	0.0684428
Mouse	B cell	0.0338335	0.0267146	0.0307502	0.0186768	0.0430604
Mouse	B cell	0.0360266	0.0280137	0.0313932	0.0200456	0.0501682
Mouse	ESC	0.0359052	0.0222961	0.0295897	0.0179458	0.0554054
Rat	Left ventricle	0.0141284	0.0112495	0.0136989	0.0105927	0.0227578
*Other: SVA repeats in primates; C573_MM and RMER1A/B/C in mouse; RMER1A/B/C in rat

## Sheet: Table S4
Table S4: CpG sites in methylome alignment.
	Original assembly		Aligned to human reference genome (hg19) through Multiz100way alignment
Species	Assembly	Total #CpG	Total #CpGs	Total #CpG in 7-species blocks	Total #CpG in 7-species blocks after removing CpG deserts	#Common CpG	# sperm HMR in 7-way orthologous genome (min 5CpG)	Mean HMR size (bp)
Human	hg19	28299638	25249245	6370714	4188527	394781	30082	1419.36
Chimp	panTro4	26598660	24255877	6314282	4161881	394781	27296	1453.57
Gorilla	gorGor3	28451114	22238752	6392042	4138326	394781	27356	1451.83
Rhesus	rheMac3	25642482	20823244	6582572	4264445	394781	25729	1313.77
Mouse	mm10	21342779	8980995	6411922	3919152	394781	36974	1172.78
Rat	rn5	24713205	9401780	7394316	4317737	394781	40445	1102.66
Dog	canFam3	21342779	14167606	7898728	5098967	394781	24423	1279.51

## Sheet: Table S5
Table S5: Ultra-conserved HMR locations (hg19) and genes with transcription start site located within ultra-conserved HMRs
Chromosome	Start	End	Intersection/Union	Ensembl Gene ID	HGNC Symbol
chr1	2456398	2458806	0.717193	ENSG00000157881	PANK4
chr1	3565176	3570766	0.709302	ENSG00000116213	WRAP73
chr1	38272119	38275473	0.716458	ENSG00000197982	C1orf122
chr1	41247690	41251031	0.775217	ENSG00000117013	KCNQ4
chr1	44869238	44875972	0.7079	ENSG00000187147	RNF220
chr1	47908589	47912151	0.770634
chr1	50878067	50897485	0.714595	ENSG00000142700	DMRTA2
chr1	53526642	53529798	0.755387	ENSG00000174348	PODN
chr1	62783214	62786472	0.710252	ENSG00000132854	KANK4
chr1	113255975	113259467	0.732532	ENSG00000155367	PPM1J
chr1	114694337	114698914	0.798121	ENSG00000134207	SYT6
chr1	165319925	165327229	0.804217	ENSG00000162761	LMX1A
chr1	183438884	183443737	0.711931	ENSG00000232860	SMG7-AS1
chr1	203096159	203098464	0.724512	ENSG00000163485	ADORA1
chr1	207222467	207227963	0.75746	ENSG00000123836	PFKFB2
chr1	213123190	213126134	0.700408	ENSG00000143494	VASH2
chr1	217305850	217314861	0.786594	ENSG00000196482	ESRRG
chr1	218518150	218521677	0.807202	ENSG00000232480	TGFB2-AS1
chr10	17269001	17273977	0.850884	ENSG00000026025	VIM
chr10	23459854	23465176	0.785419
chr10	43571168	43574181	0.900763	ENSG00000165731	RET
chr10	52749779	52755193	0.701884	ENSG00000185532	PRKG1
chr10	61664103	61668951	0.824876	ENSG00000108091	CCDC6
chr10	94830958	94836005	0.816723	ENSG00000095596	CYP26A1
chr10	102288444	102290649	0.756009	ENSG00000166135	HIF1AN
chr10	102754993	102760870	0.744938	ENSG00000107816	LZTS2
chr10	103050673	103053481	0.753561
chr10	103891879	103894576	0.723026	ENSG00000148840	PPRC1
chr10	103989341	103992387	0.761983	ENSG00000107859	PITX3
chr10	104177760	104183045	0.834437	ENSG00000059915	PSD
chr10	105613367	105616645	0.704698	ENSG00000107957	SH3PXD2A
chr11	6650558	6652403	0.706775	ENSG00000255410
chr11	30604039	30609210	0.794817	ENSG00000254489
chr11	64012737	64016046	0.703838	ENSG00000173457	PPP1R14B
chr11	65380829	65384411	0.702122	ENSG00000173327	MAP3K11
chr11	72491608	72494039	0.700123	ENSG00000214530	STARD10
chr11	82610369	82614118	0.736463	ENSG00000165490	DDIAS
chr11	91955871	91961838	0.772247
chr11	100996848	101001541	0.746005	ENSG00000082175	PGR
chr11	108462428	108465404	0.759745	ENSG00000110723	EXPH5
chr11	109291794	109296398	0.736099	ENSG00000185742	C11orf87
chr11	118798243	118801824	0.776599	ENSG00000239726	RN7SL688P
chr11	118977236	118979397	0.810736	ENSG00000172375	C2CD2L
chr11	124614725	124617772	0.795537	ENSG00000255045
chr11	129241586	129247612	0.713243	ENSG00000043039	BARX2
chr12	5016681	5022203	0.811481	ENSG00000111262	KCNA1
chr12	5152063	5155375	0.705314	ENSG00000130037	KCNA5
chr12	6861067	6863763	0.810831	ENSG00000089693	MLF2
chr12	20520286	20524426	0.70314	ENSG00000172572	PDE3A
chr12	41580665	41584651	0.736327	ENSG00000165966	PDZRN4
chr12	49371219	49376485	0.846563	ENSG00000125084	WNT1
chr12	49688002	49692294	0.709226	ENSG00000135406	PRPH
chr12	54068624	54073228	0.737185	ENSG00000135390	ATP5G2
chr12	57913122	57918927	0.734539	ENSG00000175197	DDIT3
chr12	83079204	83083266	0.705318	ENSG00000179104	TMTC2
chr12	91346486	91349951	0.738817	ENSG00000197651	CCER1
chr12	106971755	106982109	0.739135	ENSG00000111783	RFX4
chr12	107710782	107715689	0.804972	ENSG00000151136	BTBD11
chr13	22241880	22251907	0.753067	ENSG00000102678	FGF9
chr13	53418649	53426879	0.907898	ENSG00000136099	PCDH8
chr13	96293121	96298599	0.701898	ENSG00000134874	DZIP1
chr13	103051354	103055444	0.756479	ENSG00000102466	FGF14
chr14	24615210	24618235	0.727603	ENSG00000100911	PSME2
chr14	24834497	24839947	0.857982	ENSG00000100968	NFATC4
chr14	37048187	37055347	0.751117	ENSG00000136327	NKX2-8
chr14	42072938	42080342	0.800648	ENSG00000258636
chr14	61107344	61111323	0.820055	ENSG00000258952
chr14	73357519	73362334	0.815369	ENSG00000205683	DPF3
chr14	75742887	75748341	0.739091	ENSG00000170345	FOS
chr14	90419883	90423815	0.771617	ENSG00000140025	EFCAB11
chr14	101290145	101295124	0.840731	ENSG00000214548	MEG3
chr15	44485227	44488719	0.713918	ENSG00000171877	FRMD5
chr15	48007764	48012023	0.725053	ENSG00000137872	SEMA6D
chr15	53095036	53099355	0.785135	ENSG00000259203
chr15	64384806	64390472	0.789975	ENSG00000166797	FAM96A
chr15	66992315	66997596	0.740958	ENSG00000137834	SMAD6
chr15	70386632	70394551	0.786716	ENSG00000140332	TLE3
chr15	75247026	75252905	0.790951	ENSG00000178718	RPP25
chr15	82334495	82342405	0.701138	ENSG00000222521
chr15	89875820	89879925	0.733739	ENSG00000140521	POLG
chr16	2204380	2206929	0.707728	ENSG00000206630	SNORD60
chr16	10273029	10278381	0.714873	ENSG00000183454	GRIN2A
chr16	22824070	22827696	0.751793	ENSG00000122254	HS3ST2
chr16	31083264	31086602	0.741761	ENSG00000167394	ZNF668
chr16	51166550	51169648	0.704648
chr16	54314980	54326821	0.854995	ENSG00000177508	IRX3
chr16	58033485	58036536	0.735169	ENSG00000166188	ZNF319
chr16	67142239	67145409	0.759937	ENSG00000125149	C16orf70
chr16	67260153	67262020	0.75308	ENSG00000125122	LRRC29
chr16	67561506	67564931	0.709197	ENSG00000039523	FAM65A
chr16	67906303	67908191	0.715572	ENSG00000038358	EDC4
chr16	71390924	71393481	0.716074	ENSG00000172137	CALB2
chr17	1617290	1621310	0.718905	ENSG00000186594	MIR22HG
chr17	2301654	2306905	0.778518	ENSG00000070444	MNT
chr17	4401147	4404222	0.72065	ENSG00000183018	SPNS2
chr17	4641296	4644102	0.75196	ENSG00000161921	CXCL16
chr17	6914589	6919706	0.741059	ENSG00000215067	ALOX12-AS1
chr17	7337960	7345124	0.815466	ENSG00000181284	TMEM102
chr17	7619454	7622155	0.711959	ENSG00000183914	DNAH2
chr17	8867701	8870624	0.782415	ENSG00000141506	PIK3R5
chr17	13502948	13507160	0.700617	ENSG00000153976	HS3ST3A1
chr17	14197200	14209113	0.705532	ENSG00000262786
chr17	32904966	32910279	0.707322	ENSG00000197322	C17orf102
chr17	39966838	39970118	0.710061	ENSG00000141696	LEPREL4
chr17	43859817	43863742	0.793631	ENSG00000120088	CRHR1
chr17	43970328	43976008	0.719014	ENSG00000186868	MAPT
chr17	48276295	48279503	0.811721	ENSG00000108821	COL1A1
chr17	56400937	56403419	0.701853	ENSG00000265148	BZRAP1-AS1
chr17	59485145	59491206	0.731562	ENSG00000121068	TBX2
chr17	79365456	79375396	0.827163	ENSG00000263053
chr18	902540	910720	0.735452	ENSG00000265179
chr18	4453104	4456924	0.760733	ENSG00000170579	DLGAP1
chr18	20138409	20141051	0.711961
chr18	30348266	30353699	0.733665	ENSG00000228835
chr18	43912694	43916350	0.81674	ENSG00000141622	RNF165
chr18	44785878	44792059	0.779
chr19	11491061	11495850	0.716433	ENSG00000187266	EPOR
chr19	15305891	15307454	0.785029
chr19	33715770	33719108	0.715998	ENSG00000130876	SLC7A10
chr19	42745366	42750259	0.736767	ENSG00000105723	GSK3A
chr19	47162029	47165861	0.864823	ENSG00000245598	DACT3-AS1
chr19	48866021	48868185	0.716728	ENSG00000161558	TMEM143
chr19	49943702	49947930	0.724929	ENSG00000104888	SLC17A7
chr19	55689497	55692423	0.775803	ENSG00000129990	SYT5
chr2	18058086	18062005	0.72544	ENSG00000170745	KCNS3
chr2	27068913	27073687	0.775869	ENSG00000157851	DPYSL5
chr2	27439417	27441762	0.701919	ENSG00000084774	CAD
chr2	27484238	27488335	0.880888	ENSG00000115194	SLC30A3
chr2	37897008	37900941	0.726418	ENSG00000163171	CDC42EP3
chr2	38299728	38305588	0.709215	ENSG00000138061	CYP1B1
chr2	39003292	39006306	0.762774	ENSG00000152147	GEMIN6
chr2	47795647	47799817	0.765707	ENSG00000184261	KCNK12
chr2	72369291	72378011	0.875	ENSG00000003137	CYP26B1
chr2	74755445	74758417	0.786676	ENSG00000115307	AUP1
chr2	105457742	105463385	0.734716
chr2	121491745	121496051	0.761728	ENSG00000074047	GLI2
chr2	133425320	133429623	0.772949	ENSG00000150551	LYPD1
chr2	135474021	135478807	0.70163	ENSG00000152128	TMEM163
chr2	136873202	136878265	0.739088	ENSG00000121966	CXCR4
chr2	151340570	151345201	0.746275	ENSG00000115963	RND3
chr2	162092914	162096921	0.823808
chr2	165695827	165699918	0.733073	ENSG00000233255
chr2	170216314	170221776	0.740388	ENSG00000081479	LRP2
chr2	171566966	171576456	0.771233	ENSG00000222033	LINC01124
chr2	213399880	213405663	0.758949	ENSG00000178568	ERBB4
chr2	219723070	219726484	0.816344	ENSG00000115596	WNT6
chr3	9593298	9596449	0.782291	ENSG00000156959	LHFPL4
chr3	9986957	9990081	0.758003	ENSG00000230082	PRRT3-AS1
chr3	45634070	45637006	0.766349	ENSG00000144791	LIMD1
chr3	48697873	48703005	0.701676	ENSG00000008300	CELSR3
chr3	49054743	49060912	0.823959	ENSG00000178149	DALRD3
chr3	50241806	50244223	0.700455	ENSG00000188338	SLC38A3
chr3	50604104	50608059	0.720607	ENSG00000088543	C3orf18
chr3	52566348	52571785	0.806879	ENSG00000168268	NT5DC2
chr3	53526236	53530990	0.701304	ENSG00000157388	CACNA1D
chr3	61544559	61551534	0.817921	ENSG00000144724	PTPRG
chr3	62858656	62862419	0.816901	ENSG00000163618	CADPS
chr3	64669896	64675324	0.883014	ENSG00000241684	ADAMTS9-AS2
chr3	71832486	71835998	0.714692	ENSG00000163421	PROK2
chr3	105083693	105089485	0.784703	ENSG00000170017	ALCAM
chr3	119012221	119014968	0.728431	ENSG00000031081	ARHGAP31
chr3	122744322	122748200	0.739041	ENSG00000082684	SEMA5B
chr3	128214894	128217792	0.703589
chr3	128718674	128723878	0.800922	ENSG00000114654	EFCC1
chr3	133747223	133750124	0.719752	ENSG00000174640	SLCO2A1
chr3	134091432	134094682	0.703692	ENSG00000114019	AMOTL2
chr3	140768621	140772497	0.770898	ENSG00000175093	SPSB4
chr3	147135880	147144216	0.800384	ENSG00000152977	ZIC1
chr3	181440308	181446249	0.841441
chr4	41213971	41220037	0.778602	ENSG00000163697	APBB2
chr4	47032488	47036023	0.718812	ENSG00000163288	GABRB1
chr4	77816729	77820612	0.732681	ENSG00000186212	SOWAHB
chr4	83481713	83485066	0.83567	ENSG00000249242	TMEM150C
chr4	114680298	114684912	0.742956	ENSG00000145349	CAMK2D
chr4	126233826	126239981	0.71779	ENSG00000196159	FAT4
chr4	185936574	185943759	0.830341	ENSG00000187821	HELT
chr5	32708613	32715564	0.871961	ENSG00000113389	NPR3
chr5	33934173	33939931	0.714831	ENSG00000182631	RXFP3
chr5	37833406	37842357	0.809183	ENSG00000168621	GDNF
chr5	44387129	44391329	0.734048	ENSG00000248464	FGF10-AS1
chr5	57876910	57880634	0.778464	ENSG00000152932	RAB3C
chr5	59063401	59065606	0.730612	ENSG00000113448	PDE4D
chr5	63253615	63259507	0.819586	ENSG00000178394	HTR1A
chr5	63800546	63803824	0.723002	ENSG00000186479	RGS7BP
chr5	82765962	82772511	0.741335	ENSG00000038427	VCAN
chr5	83676637	83682198	0.728646	ENSG00000164176	EDIL3
chr5	107002921	107010552	0.788887	ENSG00000184349	EFNA5
chr5	115907209	115914409	0.731389	ENSG00000092421	SEMA6A
chr5	132160438	132162549	0.720038	ENSG00000164403	SHROOM1
chr5	137687462	137691948	0.756353	ENSG00000120733	KDM3B
chr5	139088043	139092352	0.708285
chr5	139124944	139128933	0.740537	ENSG00000249131	PSD2-AS1
chr5	140247754	140251228	0.712147	ENSG00000249158	PCDHA11
chr5	140766186	140769847	0.773559	ENSG00000253953	PCDHGB4
chr5	140776804	140780386	0.742323
chr5	140891960	140894357	0.734251
chr5	141254554	141259521	0.830481	ENSG00000156453	PCDH1
chr5	141487146	141490180	0.738629	ENSG00000131507	NDFIP1
chr5	149681304	149683157	0.7102	ENSG00000183876	ARSI
chr5	158521202	158528826	0.827256	ENSG00000164330	EBF1
chr5	158530724	158534958	0.796646
chr5	175962521	175965743	0.712291	ENSG00000146083	RNF44
chr5	176729333	176732013	0.754104	ENSG00000169228	RAB24
chr5	176793335	176795495	0.722685	ENSG00000169220	RGS14
chr6	30522216	30526610	0.702549	ENSG00000204590	GNL1
chr6	30881030	30883614	0.702786	ENSG00000137411	VARS2
chr6	31695486	31698899	0.825666	ENSG00000213722	DDAH2
chr6	31925722	31927443	0.780941	ENSG00000204356	NELFE
chr6	32142643	32147261	0.720009	ENSG00000204310	AGPAT1
chr6	33159733	33161669	0.704545	ENSG00000204248	COL11A2
chr6	33238023	33241221	0.801126	ENSG00000223501	VPS52
chr6	33587421	33590393	0.729139	ENSG00000096433	ITPR3
chr6	36806227	36809313	0.785807	ENSG00000124772	CPNE5
chr6	37662908	37667956	0.761093	ENSG00000112139	MDGA1
chr6	42980466	42983117	0.755187	ENSG00000124733	MEA1
chr6	43241971	43244733	0.748009
chr6	73328629	73333937	0.775245	ENSG00000185760	KCNQ5
chr6	91319369	91323092	0.727102
chr6	97343954	97347248	0.715543	ENSG00000123545	NDUFAF4
chr6	100048824	100057350	0.704668	ENSG00000112238	PRDM13
chr6	106439127	106444059	0.754461
chr6	110298252	110301980	0.754292	ENSG00000146360	GPR6
chr7	8472165	8477843	0.862452	ENSG00000122584	NXPH1
chr7	27168278	27171906	0.739802	ENSG00000254369	HOXA-AS3
chr7	28994259	28999824	0.718958	ENSG00000228421
chr7	75931258	75933779	0.718762	ENSG00000106211	HSPB1
chr7	94283268	94288740	0.841374	ENSG00000127990	SGCE
chr7	96630712	96637843	0.829477	ENSG00000231764	DLX6-AS1
chr7	113721654	113729534	0.704442	ENSG00000128573	FOXP2
chr7	123670971	123675224	0.760169	ENSG00000242593
chr7	142550963	142554277	0.713337	ENSG00000106123	EPHB6
chr8	21644302	21648693	0.70189	ENSG00000168546	GFRA2
chr8	22546111	22554405	0.803352	ENSG00000253125
chr8	26369681	26373532	0.83329	ENSG00000240694	PNMA2
chr8	29204313	29211878	0.815598	ENSG00000120875	DUSP4
chr8	37821301	37824845	0.708521	ENSG00000188778	ADRB3
chr8	68254020	68257299	0.780116	ENSG00000066777	ARFGEF1
chr9	2013765	2019647	0.767086	ENSG00000080503	SMARCA2
chr9	2620106	2624304	0.80181	ENSG00000236404	VLDLR-AS1
chr9	12774463	12777151	0.787946	ENSG00000153714	LURAP1L
chr9	20618758	20625616	0.712307	ENSG00000171843	MLLT3
chr9	34988235	34991180	0.717827	ENSG00000137094	DNAJB5
chr9	37033583	37039427	0.761636	ENSG00000196092	PAX5
chr9	80910626	80913924	0.78108	ENSG00000135069	PSAT1
chr9	102579254	102588851	0.737835	ENSG00000237461
chr9	129484082	129487371	0.703861
chrX	90688732	90692217	0.747776	ENSG00000174740	PABPC5
chrX	107680330	107684740	0.777324	ENSG00000197565	COL4A6
chrX	124335074	124341422	0.71046	ENSG00000232599
chrX	150341697	150348431	0.729433	ENSG00000102195	GPR50

## Sheet: Table S6
Table S6: Enriched Biological processes associated with ultra-conserved HMRs
GOrilla analysis Type: enriched GO terms in a target list of genes compared to a background list of genes
Target gene list: human Ensembl genes with TSS located in ultra-conserved HMRs
Background gene list: human Ensembl genes with TSS located in the intersection of sperm HMRs in all seven species
P-value cutoff	10^-3
Biological Processes
GO Term	Description	P-value	FDR q-value	Enrichment	N	B	n	b
GO:0007399	nervous system development	4.16e-08	0.000523	4.23	8143	157	245	20
GO:0048856	anatomical structure development	7.4e-08	0.000465	1.74	8143	1546	245	81
GO:0048731	system development	1.79e-07	0.000749	2.85	8143	350	245	30
GO:0032502	developmental process	2.65e-07	0.000833	1.54	8143	2216	245	103
GO:0023052	signaling	5.67e-07	0.00143	2.97	8143	291	245	26
GO:0097485	neuron projection guidance	8.26e-07	0.00173	4.29	8143	124	245	16
GO:0007165	signal transduction	2.52e-06	0.00453	1.56	8143	1876	245	88
GO:0007267	cell-cell signaling	3.14e-06	0.00493	2.94	8143	260	245	23
GO:0007411	axon guidance	3.77e-06	0.00527	4.05	8143	123	245	15
GO:0051239	regulation of multicellular organismal process	1.28e-05	0.016	1.69	8143	1220	245	62
GO:0048566	embryonic digestive tract development	5.09e-05	0.0581	16.62	8143	8	245	4
GO:0051240	positive regulation of multicellular organismal process	9.89e-05	0.104	1.9	8143	647	245	37
GO:0032501	multicellular organismal process	0.0001	0.0968	1.56	8143	1360	245	64
GO:0007610	behavior	0.000122	0.11	2.53	8143	263	245	20
GO:2000026	regulation of multicellular organismal development	0.000138	0.116	1.74	8143	861	245	45
GO:0032879	regulation of localization	0.000175	0.138	1.6	8143	1164	245	56
GO:0007154	cell communication	0.000182	0.134	2.19	8143	380	245	25
GO:0007186	G-protein coupled receptor signaling pathway	0.000302	0.211	2.5	8143	239	245	18
GO:0007568	aging	0.000313	0.207	3.24	8143	123	245	12
GO:0010646	regulation of cell communication	0.000323	0.203	1.48	8143	1501	245	67
GO:1901216	positive regulation of neuron death	0.00035	0.209	5.17	8143	45	245	7
GO:0051049	regulation of transport	0.000432	0.247	1.69	8143	826	245	42
GO:0006720	isoprenoid metabolic process	0.000461	0.252	4.95	8143	47	245	7
GO:0023051	regulation of signaling	0.000465	0.244	1.47	8143	1520	245	67
GO:0050793	regulation of developmental process	0.000566	0.285	1.56	8143	1107	245	52
GO:0045595	regulation of cell differentiation	0.000608	0.294	1.69	8143	787	245	40
GO:0044057	regulation of system process	0.000706	0.329	2.48	8143	214	245	16
GO:0051094	positive regulation of developmental process	0.000729	0.327	1.83	8143	563	245	31
GO:0006721	terpenoid metabolic process	0.000741	0.321	5.39	8143	37	245	6
GO:0034653	retinoic acid catabolic process	0.000902	0.378	33.24	8143	2	245	2
GO:0016115	terpenoid catabolic process	0.000902	0.366	33.24	8143	2	245	2
GO:0016103	diterpenoid catabolic process	0.000902	0.354	33.24	8143	2	245	2
GO:0033141	positive regulation of peptidyl-serine phosphorylation of STAT protein	0.000902	0.343	33.24	8143	2	245	2
GO:0021551	central nervous system morphogenesis	0.000902	0.333	33.24	8143	2	245	2
GO:0060513	prostatic bud formation	0.000902	0.324	33.24	8143	2	245	2
GO:0010942	positive regulation of cell death	0.000921	0.321	2.17	8143	307	245	20
GO:0043065	positive regulation of apoptotic process	0.000938	0.319	2.22	8143	285	245	19
Molecular Function
GO Term	Description	P-value	FDR q-value	Enrichment	N	B	n	b
GO:0004871	signal transducer activity	7.78e-06	0.0268	2.26	8143	485	245	33
GO:0038023	signaling receptor activity	9.87e-05	0.17	2.37	8143	322	245	23
GO:0000978	RNA polymerase II core promoter proximal region sequence-specific DNA binding	0.000125	0.144	2.78	8143	203	245	17
GO:0004888	transmembrane signaling receptor activity	0.000129	0.111	2.52	8143	264	245	20
GO:0000987	core promoter proximal region sequence-specific DNA binding	0.0002	0.138	2.68	8143	211	245	17
GO:0001159	core promoter proximal region DNA binding	0.000224	0.129	2.65	8143	213	245	17
GO:0008467	[heparan sulfate]-glucosamine 3-sulfotransferase 1 activity	0.000257	0.127	19.94	8143	5	245	3
GO:0019825	oxygen binding	0.000257	0.111	19.94	8143	5	245	3
GO:0099600	transmembrane receptor activity	0.000297	0.114	2.37	8143	281	245	20
GO:0000976	transcription regulatory region sequence-specific DNA binding	0.000484	0.167	2.09	8143	382	245	24
GO:0005102	receptor binding	0.000526	0.165	1.82	8143	602	245	33
GO:0000977	RNA polymerase II regulatory region sequence-specific DNA binding	0.000585	0.168	2.14	8143	341	245	22
GO:0001012	RNA polymerase II regulatory region DNA binding	0.000585	0.155	2.14	8143	341	245	22
GO:0004872	receptor activity	0.000845	0.208	1.97	8143	421	245	25
GO:0060089	molecular transducer activity	0.000845	0.194	1.97	8143	421	245	25
GO:0022836	gated channel activity	0.000876	0.189	3.07	8143	119	245	11
GO:0033872	[heparan sulfate]-glucosamine 3-sulfotransferase 3 activity	0.000902	0.183	33.24	8143	2	245	2
GO:0044212	transcription regulatory region DNA binding	0.000924	0.177	1.9	8143	472	245	27
GO:0022832	voltage-gated channel activity	0.00093	0.169	3.91	8143	68	245	8
GO:0005244	voltage-gated ion channel activity	0.00093	0.16	3.91	8143	68	245	8
GO:0000975	regulatory region DNA binding	0.000985	0.161	1.89	8143	474	245	27
GO:1990837	sequence-specific double-stranded DNA binding	0.000997	0.156	1.98	8143	402	245	24
Cellular Component
GO Term	Description	P-value	FDR q-value	Enrichment	N	B	n	b
GO:0031226	intrinsic component of plasma membrane	1.26e-05	0.0201	2.18	8143	519	245	34
GO:0097458	neuron part	2.35e-05	0.0188	1.96	8143	677	245	40
GO:0005887	integral component of plasma membrane	3.29e-05	0.0175	2.14	8143	497	245	32
GO:0099501	exocytic vesicle membrane	0.000328	0.131	6.23	8143	32	245	6
GO:0030672	synaptic vesicle membrane	0.000328	0.104	6.23	8143	32	245	6
GO:0044459	plasma membrane part	0.000598	0.159	1.6	8143	1000	245	48
GO:0044456	synapse part	0.000632	0.144	2.13	8143	343	245	22
GO:0043005	neuron projection	0.000651	0.13	2.05	8143	390	245	24
GO:0005587	collagen type IV trimer	0.000902	0.16	33.24	8143	2	245	2
GO:0034703	cation channel complex	0.000978	0.156	3.52	8143	85	245	9
Enrichment (N, B, n, b) is defined as follows:
N - is the total number of genes
B - is the total number of genes associated with a specific GO term
n - is the number of genes in the top of the user's input list or in the target set when appropriate
b - is the number of genes in the intersection
Enrichment = (b/n) / (B/N)

## Sheet: Table S7
Table S7: Sizes of species-specific hypomethylated and hypermethylated regions
Methylome alignment was divided into 200bp-bins. Each bin in each species was classified into hypomethylated or hypermethylation using a certain cutoff for regional average methylation level.
		Total size of species-specific hypomethylated or hypermethylated regions (Mbp)
	Methylation level cut off	Human	Chimp	Gorilla	Rhesus	Mouse	Rat	Dog
species-specific hypomethylation (level < cutoff)	0.2	0.3636	0.6566	0.927	1.1006	2.041	3.3368	0.9928
	0.3	0.489	0.8002	1.1414	1.2634	2.3148	3.7188	1.1188
	0.4	0.6044	0.962	1.5316	1.5612	2.5114	4.1076	1.28
	0.5	0.7736	1.235	2.178	2.2264	2.6016	4.5226	1.4918
species-specific hypermethylation (level > cutoff)	0.5	0.0234	0.0358	0.0172	0.1492	0.4316	0.4546	1.202
	0.6	0.0268	0.0392	0.021	0.1698	0.4328	0.4298	1.2958
	0.7	0.0358	0.043	0.0248	0.188	0.4456	0.4108	1.393
	0.8	0.0556	0.0396	0.0336	0.2574	0.514	0.4142	1.5262

## Sheet: Table S8
Table S8: Phylogenetic tree and phylo-epigenetic trees
Tree1 and Tree5 are shown in Fig. 2A. Tree2 is shown in Supplemental Fig. S3E. Tree6 and Tree7 are shown in Supplemental Fig. S4E and Fig. S5E. See Supplemental Methods about Tree4.
				Branch lengths													Branch length correlation between models						Other model parameters for methylome evolution
	Model	Input	Alignment source	Human	Chimp	Hominini	Gorilla	Homininae	Rhesus	Catarrhini	Mouse	Rat	Murinae	Euarchontoglire	Dog	Unit interpretation	Tree2	Tree3	Tree4	Tree5	Tree6	Tree7	pi_0	rate (unmeth -> meth)	rate (meth -> unmeth)	f_0	f_1	g_0	g_1	branch scaling factor
Tree1	unrestricted independent-site	DNA multiple sequence alignment	Multiz100way(hg19)	0.00548496	0.0057764	0.00175666	0.00725784	0.0175174	0.0310902	0.0902289	0.0693897	0.0752343	0.272587	0.00635052	0.176771	1 substitution per base	0.28006	0.382453	0.366867	0.737722	0.711213	0.769704
Tree2	unrestricted independent-site	200bp-bin binary methylation states	Multiz100way(hg19)	0.0137246	0.0222536	0.00460817	0.0345095	0.0150647	0.0306147	0.0186515	0.0335125	0.0550133	0.0317075	0.0133713	0.0194383	1 methylation state change per 200bp bin		0.973302	0.892198	0.680379	0.698463	0.636187	0.131836	1.03181	0.992901
Tree3	reversible independent-site	200bp-bin binary methylation states	Multiz100way(hg19)	0.0152872	0.0231	0.0052149	0.0333258	0.0177028	0.0362611	0.0211114	0.0362885	0.0603115	0.0415394	0.0227579	0.0227579	1 methylation state change per 200bp bin			0.895005	0.669116	0.682707	0.640155	0.182465	2.74026	0.611594
Tree4	unrestricted independent-site model	Single-CpG posterior methylation probability	Multiz100way(hg19)	0.0192021	0.0130886	0.00470258	0.0203061	0.0103286	0.0360902	0.0143622	0.0365889	0.0561595	0.0284191	0.0101021	0.0286028	1 methylation state change per CpG site				0.747853	0.741604	0.739297	0.13643	1.01907	0.996988
Tree5	dependent-site phylo-epigenetic model	Single-CpG posterior methylation probability	Multiz100way(hg19)	0.438242	0.483486	0.174121	0.533905	0.522948	0.657527	0.565565	0.80988	0.865461	0.97688	0.0224654	0.880165	unscaled					0.995769	0.966783	0.0779114	0.922704	0.077296	0.99574	0.998957	0.986901	0.892942	0.021163
Tree6	dependent-site phylo-epigenetic model	Single-CpG posterior methylation probability	Multiz60way(mm10)	0.43809	0.480454	0.108137	0.538755	0.509417	0.618136	0.547009	0.78937	0.816139	0.932666	0.019837	0.800725	unscaled						0.95703	0.0732769	0.920276	0.079724	0.995653	0.998861	0.987936	0.896314	0.0226946
Tree7	dependent-site phylo-epigenetic model	Single-CpG posterior methylation probability	Multiz100way(hg19) placental conerved elements	0.180764	0.223091	0.0187331	0.220725	0.145798	0.28894	0.19582	0.360535	0.375356	0.457426	0.00222206	0.484102	unscaled							0.141008	0.8358	0.1642	0.998476	0.999041	0.993459	0.948873	0.0313569

## Sheet: Table S9
Table S9: Methylation mutation events inferred by interdependent-site phylo-epigenetic model.
Related to Fig. 2D. Events less than 50bp or adjacent to CpG deserts are excluded.
	HMR gain					HMR loss
		Birth		Extension			Death		Contraction
Descendant	Total size (Mbp)	#birth	mean size (bp)	#extension	mean size (bp)	Total size (Mbp)	#death	mean size (bp)	#contraction	mean size (bp)
Euarchontoglire	0.255567	187	400.374	1279	141.28	0.102271	21	174.762	667	147.828
Catarrhini	1.96589	1425	570.676	3803	303.099	0.383581	282	542.411	1081	213.34
Homininae	2.05768	1453	529.84	4544	283.41	0.111092	103	332.35	482	159.461
Hominini	0.587045	925	339.85	1511	180.466	0.014147	13	148.538	113	108.106
Human	2.1218	3187	374.019	3811	243.979	0.124407	121	218.669	672	145.756
Chimp	1.8778	1437	471.759	4373	274.384	0.490609	478	246.948	2224	167.522
Gorilla	2.60414	3163	380.408	5180	270.447	0.387845	347	337.539	1631	165.983
Rhesus	2.59139	5141	369.725	2958	233.481	0.690634	384	429.505	2517	208.861
Murinae	3.99877	5184	612.917	2600	315.928	0.95581	349	606.573	2834	262.567
Mouse	6.25236	7890	530.156	6800	304.328	0.51375	274	359.909	1906	217.804
Rat	6.5642	9150	513.895	6019	309.364	1.16941	342	432.02	4160	245.592
Dog	2.62163	4621	414.352	2359	299.667	1.38909	489	800.264	2857	349.233

## Sheet: Table S10
Table S10: Histone H3K4me3 and H3K27me3 marks in human and mouse sperm HMRs.
Promoter HMRs are HMRs overlapping gene promoters (TSS +/- 1kb).
Chromatin state of each region is determined by regional average histone modification enrichment (log2 ratio) with cutoff 1.
Human-specific: The extension region is also hypomethylated in human ESC but not in mouse ESC
Human-sperm specific: The extension region is methylated in human ESC.
HMRs in 7-way orthologous genome	# HMR		Proportion bearing histone modification
Human sperm 7orth hmr	Promoter	12216	bivalent	0.37631
			H3K4me3 only	0.0394565	total H3K4me3	0.415766
			H3K27me3 only	0.5722	total H3K27me3	0.94851
			none	0.0120334
	Non-promoter	16750	bivalent	0.376418
			H3K4me3 only	0.304478	total H3K4me3	0.680896
			H3K27me3 only	0.145313	total H3K27me3	0.521731
			none	0.173791
Mouse sperm 7orth hmr	Promoter	12170	bivalent	0.16779
			H3K4me3 only	0.179047	total H3K4me3	0.346837
			H3K27me3 only	0.575842	total H3K27me3	0.743632
			none	0.0773213
	Non-promoter	22620	bivalent	0.115429
			H3K4me3 only	0.38183	total H3K4me3	0.497259
			H3K27me3 only	0.143943	total H3K27me3	0.259372
			none	0.358798
HMR with lineage-specific extension in sperm		Promoter HMR				Non-promoter HMR
		Human-specific	Human-sperm specific	Mouse-specific	Mouse-sperm specific	Human-specific	Human-sperm specific	Mouse-specific	Mouse-sperm specific
Histone modification in round spermatid	bivalent	344	701	81	141	136	309	38	94
	H3K4me3 only	137	957	59	92	9	73	20	39
	H3K27me3 only	102	218	71	291	59	233	74	407
	none	21	161	20	80	7	77	39	177
Enrichment (ob/ex)	bivalent	1.51348	0.914495	2.08981	1.39128	1.71232	1.18627	1.92519	1.13578
	H3K4me3 only	5.74864	11.907	1.4265	0.850715	0.140089	0.346466	0.306312	0.142454
	H3K27me3 only	0.295131	0.187033	0.533756	0.836667	1.92427	2.3171	3.00639	3.94353
	none	2.88931	6.5682	1.11974	1.71299	0.190892	0.640261	0.635651	0.688025
	total H3K4me3	1.9154	1.95769	1.74739	1.11223	1.00926	0.81073	0.682102	0.373035
	total H3K27me3	0.778495	0.475645	0.884858	0.961809	1.77135	1.50123	2.52522	2.69399

[truncated: 3 more sheets: Table S11, Table S12, Table S13]
